# Supplementary material for: The Role of Polycomb Repressive Complex in Malignant Peripheral Nerve Sheath Tumor
Source: Genes (Basel). 2020 Mar 9;11(3):287. doi: 10.3390/genes11030287 (PMC7140867; doi:10.3390/genes11030287)
Supplement: Supplementary file 1 [file genes-11-00287-s001.xlsx]

## Sheet: Sheet1
Sample	Gene	Alteration	Type	Reference
Sample_13T	SUZ12	Fusion	Fusion	Lee et al., 2014
Sample_18T	SUZ12	Fusion	Fusion	Lee et al., 2014
Sample_2T	SUZ12	Fusion	Fusion	Lee et al., 2014
Sample_7T	SUZ12	Fusion	Fusion	Lee et al., 2014
Sample_8T	SUZ12	HOMDEL	CNA	Lee et al., 2014
Sample_10T	SUZ12	HOMDEL	CNA	Lee et al., 2014
MPNST22	SUZ12	H471R	MISSENSE	Lee et al., 2014
MPNST46.1	SUZ12	G291fs	TRUNC	Lee et al., 2014
Sample_5T	SUZ12	HOMDEL	CNA	Lee et al., 2014
MPNST21.1	SUZ12	Q504fs	TRUNC	Lee et al., 2014
MPNST25	SUZ12	HOMDEL	CNA	Lee et al., 2014
MPNST23	SUZ12	HOMDEL	CNA	Lee et al., 2014
MPNST18	SUZ12	HOMDEL	CNA	Lee et al., 2014
MPNST01	SUZ12	HOMDEL	CNA	Lee et al., 2014
MPNST29	SUZ12	N651fs	TRUNC	Lee et al., 2014
MPNST45	SUZ12	Y565fs	TRUNC	Lee et al., 2014
MPNST44	SUZ12	L564fs	TRUNC	Lee et al., 2014
MPNST04.2	SUZ12	HETLOSS	CNA	Lee et al., 2014
MPNST14	SUZ12	HETLOSS	CNA	Lee et al., 2014
MPNST43.1	SUZ12	HETLOSS	CNA	Lee et al., 2014
MPNST13.1	SUZ12	HETLOSS	CNA	Lee et al., 2014
MPNST03	SUZ12	HETLOSS	CNA	Lee et al., 2014
MPNST27	SUZ12	HETLOSS	CNA	Lee et al., 2014
MPNST21.2	SUZ12	HETLOSS	CNA	Lee et al., 2014
MPNST28	SUZ12	LOW	PROT	Lee et al., 2014
Sample_11T	EED	H213Lfs*20	TRUNC	Lee et al., 2014
Sample_12T	EED	H213Lfs*20	TRUNC	Lee et al., 2014
Sample_14T	EED	X287_splice	TRUNC	Lee et al., 2014
Sample_15T	EED	F289Yfs*9	TRUNC	Lee et al., 2014
Sample_16T	EED	I251*	TRUNC	Lee et al., 2014
MPNST28	EED	V121D	MISSENSE	Lee et al., 2014
MPNST51	EED	A114P	MISSENSE	Lee et al., 2014
MPNST04.2	EED	H213fs	TRUNC	Lee et al., 2014
MPNST13.1	EED	G167R	MISSENSE	Lee et al., 2014
MPNST18	EED	H92fs	TRUNC	Lee et al., 2014
MPNST02.2	EED	HOMDEL	CNA	Lee et al., 2014
MPNST02.1	EED	D317fs	TRUNC	Lee et al., 2014
MPNST48	EED	HOMDEL	CNA	Lee et al., 2014
MPNST02.3	EED	HOMDEL	CNA	Lee et al., 2014
MPNST45	EED	HOMDEL	CNA	Lee et al., 2014
MPNST24	EED	HOMDEL	CNA	Lee et al., 2014
MPNST53	EED	HOMDEL	CNA	Lee et al., 2014
MPNST19	EED	HETLOSS	CNA	Lee et al., 2014
MPNST27	EED	HETLOSS	CNA	Lee et al., 2014
Patient1_1	SUZ12	E610X	TRUNC	Brohl et al., 2017
Patient1_1	EED	HETLOSS	CNA	Brohl et al., 2017
Patient3	SUZ12	E324X	TRUNC	Brohl et al., 2017
Patient4	SUZ12	HETLOSS	CNA	Brohl et al., 2017
Patient5	EED	I290fs	TRUNC	Brohl et al., 2017
TCGA-SI-A71O	EED	HETLOSS	CNA	Brohl et al., 2017
TCGA-SI-A71Q	SUZ12	HETLOSS	CNA	Brohl et al., 2017
TCGA-SI-A71Q	EED	HETLOSS	CNA	Brohl et al., 2017
TCGA-SI-AA8C	SUZ12	L574fs	TRUNC	Brohl et al., 2017
M1	SUZ12	Phe165fs	TRUNC	Sohier et al., 2017
M2	SUZ12	HETLOSS	CNA	Sohier et al., 2017
M3	SUZ12	Tyr478Ser	Missense	Sohier et al., 2017
M4	SUZ12	Glu321*	TRUNC	Sohier et al., 2017
M5	EED	HOMDEL	CNA	Sohier et al., 2017
M6	SUZ12	Asn436fs	TRUNC	Sohier et al., 2017
M7	SUZ12	HETLOSS	CNA	Sohier et al., 2017
M8	SUZ12	HETLOSS	CNA	Sohier et al., 2017
M8	EED	I343fs	TRUNC	Sohier et al., 2017
C1	SUZ12	His166Thrfs*24	TRUNC	De Raedt et al., 2014
P19	SUZ12	Met244Ilefs*24	TRUNC	De Raedt et al., 2014
C4	SUZ12	Glu321*	TRUNC	De Raedt et al., 2014
L19	SUZ12	Leu406Metfs*22	TRUNC	De Raedt et al., 2014
L3	SUZ12	Tyr430*	TRUNC	De Raedt et al., 2014
P7	SUZ12	Trp452Cysfs*4	TRUNC	De Raedt et al., 2014
L10	SUZ12	Ans477Thrfs*11	TRUNC	De Raedt et al., 2014
C3	SUZ12	Tyr478Ser	Missense	De Raedt et al., 2014
P15	SUZ12	Arg522*	TRUNC	De Raedt et al., 2014
P3	SUZ12	Ser558Ilefs*25	TRUNC	De Raedt et al., 2014
U1	SUZ12	Ser568Argfs*14	TRUNC	De Raedt et al., 2014
L19	SUZ12	Gly590Lys	Missense	De Raedt et al., 2014
P5	SUZ12	Trp617*	TRUNC	De Raedt et al., 2014
L18	SUZ12	c.275-46_275-2del_splice	TRUNC	De Raedt et al., 2014
P18	SUZ12	c.1875-7_2113del_splice	TRUNC	De Raedt et al., 2014
U2	SUZ12	c.1293+1G>C_splice	TRUNC	De Raedt et al., 2014
S1	SUZ12	HOMDEL	CNA	De Raedt et al., 2014
S2	SUZ12	HOMDEL	CNA	De Raedt et al., 2014
S3	SUZ12	HOMDEL	CNA	De Raedt et al., 2014
S4	SUZ12	HOMDEL	CNA	De Raedt et al., 2014
S5	SUZ12	HOMDEL	CNA	De Raedt et al., 2014
S6	SUZ12	HOMDEL	CNA	De Raedt et al., 2014
S7	SUZ12	HETLOSS	CNA	De Raedt et al., 2014
S8	SUZ12	HETLOSS	CNA	De Raedt et al., 2014
S9	SUZ12	HETLOSS	CNA	De Raedt et al., 2014
S10	SUZ12	HETLOSS	CNA	De Raedt et al., 2014
S11	SUZ12	HETLOSS	CNA	De Raedt et al., 2014
S12	SUZ12	HETLOSS	CNA	De Raedt et al., 2014
S13	SUZ12	HETLOSS	CNA	De Raedt et al., 2014
S14	SUZ12	HETLOSS	CNA	De Raedt et al., 2014
S15	SUZ12	HETLOSS	CNA	De Raedt et al., 2014
S16	SUZ12	HETLOSS	CNA	De Raedt et al., 2014
S17	SUZ12	HETLOSS	CNA	De Raedt et al., 2014
P26	EED	Gln292*	TRUNC	De Raedt et al., 2014
L14	EED	c.635-1G>A_splice	TRUNC	De Raedt et al., 2014
L1	EED	c.727-8_769_splice	TRUNC	De Raedt et al., 2014
S18	EED	HOMDEL	CNA	De Raedt et al., 2014
S19	EED	HOMDEL	CNA	De Raedt et al., 2014
S20	EED	HOMDEL	CNA	De Raedt et al., 2014
S21	EED	HOMDEL	CNA	De Raedt et al., 2014
S22	EED	HOMDEL	CNA	De Raedt et al., 2014
S23	EED	HETLOSS	CNA	De Raedt et al., 2014
S24	EED	HETLOSS	CNA	De Raedt et al., 2014
S25	EED	HETLOSS	CNA	De Raedt et al., 2014
S26	EED	HETLOSS	CNA	De Raedt et al., 2014
S27	EED	HETLOSS	CNA	De Raedt et al., 2014
S28	EED	HETLOSS	CNA	De Raedt et al., 2014
S29	EED	HETLOSS	CNA	De Raedt et al., 2014
MPNST_04	SUZ12	30264517-30264517delG	TRUNC	Zhang et al, 2014
MPNST_05	SUZ12	30325797-30325797insC	TRUNC	Zhang et al, 2014
MPNST_06	SUZ12	30267452-30267452delG	TRUNC	Zhang et al, 2014
MPNST_06	SUZ12	H112N	Missense	Zhang et al, 2014
MPNST_10	SUZ12	30325742-30325745delTAAT	TRUNC	Zhang et al, 2014
MPNST_02	EED	85961357-85961357delA	TRUNC	Zhang et al, 2014
T18PT1	SUZ12	30320295AAGAA->	TRUNC	Zhang et al, 2014
T23PT1*	SUZ12	H466L	Missense	Zhang et al, 2014
T30PT1*	SUZ12	W361X	TRUNC	Zhang et al, 2014
T31PT1*	SUZ12	30267491AACA->	TRUNC	Zhang et al, 2014
T35PT1	SUZ12	30267491AACA->	TRUNC	Zhang et al, 2014
T37PT1	SUZ12	S20F	Inframe	Zhang et al, 2014
T48PT1*	SUZ12	30321603GATA->	TRUNC	Zhang et al, 2014
T51PT1*	SUZ12	30302616A->	TRUNC	Zhang et al, 2014
T57PT1	SUZ12	30264363->CGGT	TRUNC	Zhang et al, 2014
T67PT1	SUZ12	30320882A->G	TRUNC	Zhang et al, 2014
T70PT1*	SUZ12	Q221X	TRUNC	Zhang et al, 2014
TCGA-QQ-A8VB-01	SUZ12	X480_splice	Other	TCGA Sarc, 2018
TCGA-SI-AA8C-01	SUZ12	R575Vfs*10	TRUNC	TCGA Sarc, 2018
